# Supplementary material for: Enteric dysbiosis-linked gut barrier disruption triggers early renal injury induced by chronic high salt feeding in mice
Source: PubMed Central journal article supplement — Exp Mol Med. 2017 Aug 25;49(8):e370–. doi: 10.1038/emm.2017.122 (PMC5579512; doi:10.1038/emm.2017.122), 2017-08-25

**Supplementary figure legend:**

**Supplementary Figure 1. The impact of chronic high salt feeding on cecal bacterial composition.** C57BL/6 mice were fed with normal or high-salt drinking water for 8 weeks (n = 7). (A, B) Percentages of each community contributed by the indicated phyla or class. HS: high salt. Results are expressed as mean  $\pm$  SEM. \*p < 0.05.

**Supplementary Figure 2. LDA along with effect size measurements was applied to present the enriched bacteria in each group in cecal content.** HS: high salt.

**Supplementary Figure 3. Heat map of the expression of all related genes (displayed by log<sub>2</sub> (RPKM)) involved in “Cytokine-cytokine receptor interaction”, “NF- $\kappa$ B signaling pathway” and “Toll-like receptor signaling pathway” based on the transcriptome analysis (n = 2).** HS: high salt.

**Supplementary Figure 4. Effect of chronic high salt feeding on sodium level in the cecal content.** C57BL/6 mice were fed with normal or high-salt drinking water for 8 weeks (n = 10). The sodium concentration of cecal content in each group. HS: high salt.

# Supplementary Figure 1

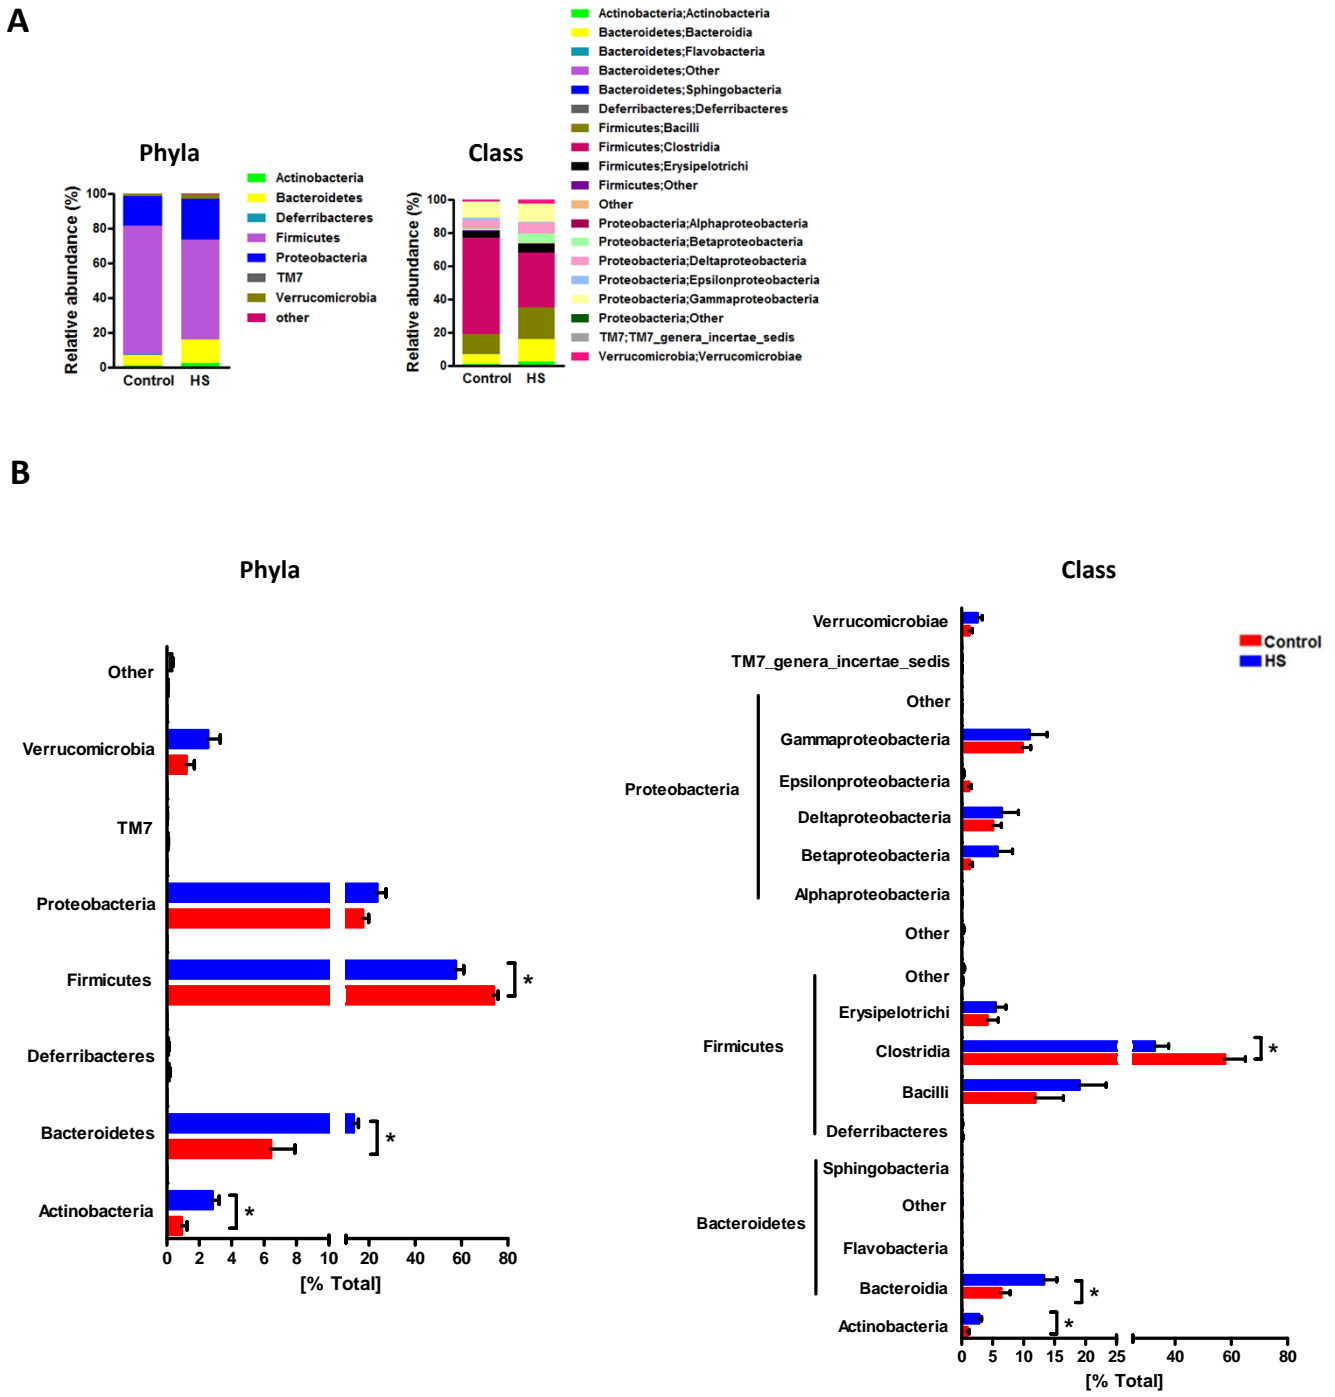

# Supplementary Figure 2

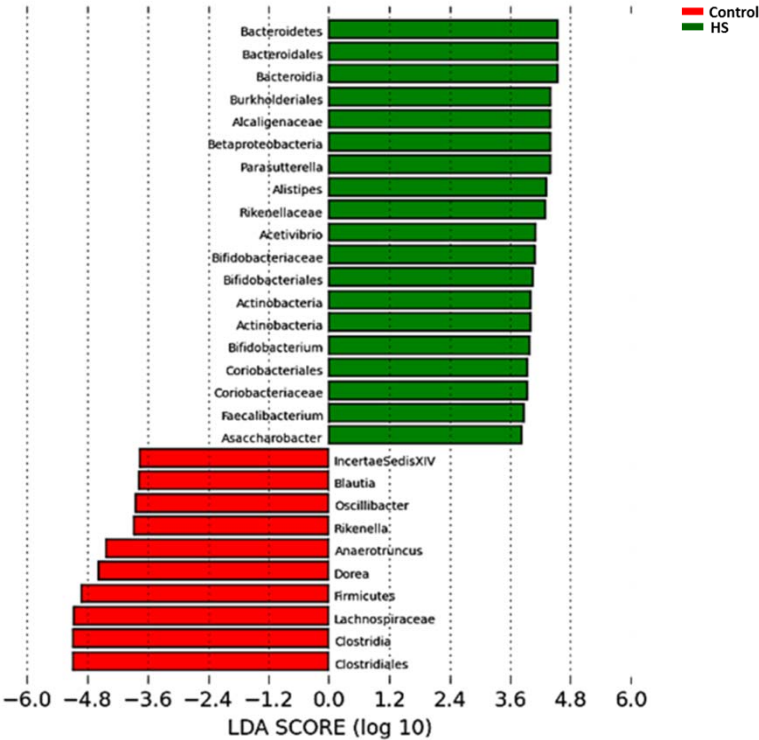

# Supplementary Figure 3

- (1) Cytokine-cytokine receptor interaction
- (2) NF-kappa B signaling pathway
- (3) Toll-like receptor signaling pathway

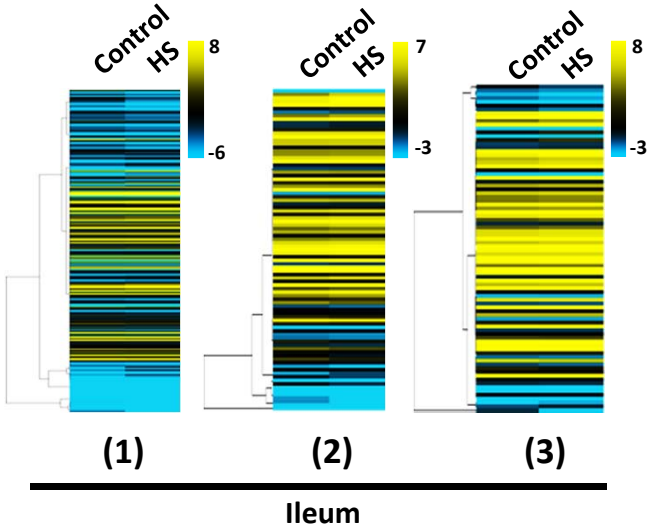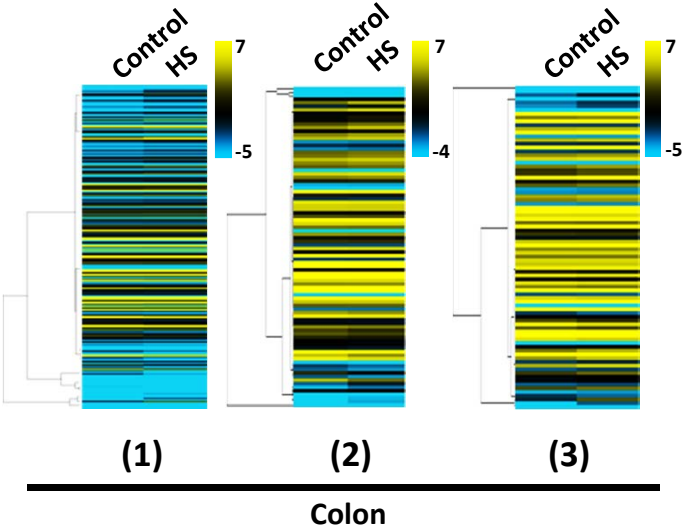

# Supplementary Figure 4

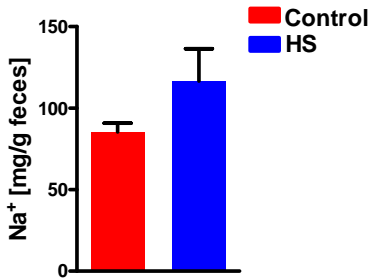

Supplement: emm2017122x1.pdf [file emm2017122x1.pdf]
